# Supplementary material for: A Multi-Drug Concentration Gradient Mixing Chip: A Novel Platform for High-Throughput Drug Combination Screening
Source: Biosensors (Basel). 2024 Apr 23;14(5):212. doi: 10.3390/bios14050212 (PMC11117479; doi:10.3390/bios14050212)
Supplement: Supplementary file 1 [file biosensors-14-00212-s001.zip]

Archive with 7 entries (7 files):
- Figure S1.jpg
- Figure S2.jpg
- Figure S3.jpg
- Figure S4.jpg
- Movie No1.avi
- Movie No2.avi
- Supplementary information.pdf
